# Supplementary material
Source: publisher figshare collection journal article supplement (https://gsajournals.figshare.com/ndownloader/files/14094038)
Supplement: Supplementary file 1 [file 14094038]

## Sheet: Sheet1
Transcript ID	Gene name (if not transcript ID)	Chr V Position (Mb)	# of GO terms	Gene Ontology Terms	Gene start position on Chr. V
CBG10425		3.57059	1	metal ion binding	3570595
CBG10397		3.66516	7	detection of chemical stimulus involved in sensory perception of smell, G-protein coupled olfactory receptor activity, G-protein coupled receptor signaling pathway, integral component of membrane, integral component of plasma membrane, membrane, olfactory behavior	3665164
CBG01430		3.9171	0		3917101
CBG26993		3.95189	2	integral component of membrane, membrane	3951887
CBG01414	Cbr-srt-35	3.98649	2	integral component of membrane, membrane	3986492
CBG26992		3.99899	3	detection of chemical stimulus involved in sensory perception, integral component of membrane, membrane	3998994
CBG01402		4.03239	9	DNA binding, metal ion binding, nucleus, regulation of transcription, DNA-templated, sequence-specific DNA binding, steroid hormone mediated signaling pathway, transcription factor activity, sequence-specific DNA binding, transcription, DNA-templated, zinc ion binding	4032387
CBG01400		4.04006	0		4040056
CBG01391	Cbr-cyp-35B2	4.07033	8	heme binding, iron ion binding, metal ion binding, monooxygenase activity, oxidation-reduction process, oxidoreductase activity, oxidoreductase activity, acting on paired donors, with incorporation or reduction of molecular oxygen, steroid hydroxylase activity	4070331
CBG01390		4.07295	8	heme binding, iron ion binding, metal ion binding, monooxygenase activity, oxidation-reduction process, oxidoreductase activity, oxidoreductase activity, acting on paired donors, with incorporation or reduction of molecular oxygen, steroid hydroxylase activity	4072954
CBG01384	Cbr-str-254	4.09315	7	detection of chemical stimulus involved in sensory perception of smell, G-protein coupled olfactory receptor activity, G-protein coupled receptor signaling pathway, integral component of membrane, integral component of plasma membrane, membrane, olfactory behavior	4093153
CBG01350		4.22885	7	detection of chemical stimulus involved in sensory perception of smell, G-protein coupled olfactory receptor activity, G-protein coupled receptor signaling pathway, integral component of membrane, integral component of plasma membrane, membrane, olfactory behavior	4228851
CBG01323		4.3097	0		4309699
CBG01321		4.31347	9	DNA binding, metal ion binding, nucleus, regulation of transcription, DNA-templated, sequence-specific DNA binding, steroid hormone mediated signaling pathway, transcription factor activity, sequence-specific DNA binding, transcription, DNA-templated, zinc ion binding	4313473
CBG26979		4.38311	2	integral component of membrane, membrane	4383106
CBG25141	Cbr-nlp-34.3	4.44644	0		4446440
CBG01270	Cbr-cyp-34A9	4.4687	8	heme binding, iron ion binding, metal ion binding, monooxygenase activity, oxidation-reduction process, oxidoreductase activity, oxidoreductase activity, acting on paired donors, with incorporation or reduction of molecular oxygen, steroid hydroxylase activity	4468696
CBG01239		4.55932	9	DNA binding, metal ion binding, nucleus, regulation of transcription, DNA-templated, sequence-specific DNA binding, steroid hormone mediated signaling pathway, transcription factor activity, sequence-specific DNA binding, transcription, DNA-templated, zinc ion binding	4559323
CBG01238		4.561	7	heme binding, integral component of membrane, iron ion binding, membrane, oxidation-reduction process, oxidoreductase activity, acting on paired donors, with incorporation or reduction of molecular oxygen, protein binding	4561000
CBG01231		4.57863	0		4578631
CBG01223		4.60794	4	G-protein coupled peptide receptor activity, G-protein coupled receptor signaling pathway, integral component of membrane, membrane	4607945
CBG01213		4.64486	4	G-protein coupled peptide receptor activity, G-protein coupled receptor signaling pathway, integral component of membrane, membrane	4644856
CBG01212		4.64785	4	G-protein coupled peptide receptor activity, G-protein coupled receptor signaling pathway, integral component of membrane, membrane	4647849
CBG01178		4.76388	0		4763883
CBG26967		4.78343	7	detection of chemical stimulus involved in sensory perception of smell, G-protein coupled olfactory receptor activity, G-protein coupled receptor signaling pathway, integral component of membrane, integral component of plasma membrane, membrane, olfactory behavior	4783434
CBG01150		4.8491	2	integral component of membrane, membrane	4849099
CBG01143		4.87109	2	integral component of membrane, membrane	4871086
CBG01136		4.8959	5	integral component of membrane, membrane, peptidyl-tyrosine dephosphorylation, protein dephosphorylation, protein tyrosine phosphatase activity	4895895
CBG01127		4.92934	3	detection of chemical stimulus involved in sensory perception, integral component of membrane, membrane	4929341
CBG12123		5.30648	2	oxidation-reduction process, oxidoreductase activity	5306477
CBG12166		5.46135	0		5461346
CBG12171		5.48451	0		5484508
CBG26854		5.57142	6	histone acetylation, histone acetyltransferase activity, nucleus, regulation of transcription, DNA-templated, transcription cofactor activity, zinc ion binding	5571417
CBG17909		5.80027	0		5800270
CBG17917		5.82209	4	integral component of membrane, membrane, metabolic process, transferase activity, transferring hexosyl groups	5822093
CBG06298	Cbr-srab-13	5.93831	2	integral component of membrane, membrane	5938311
CBG06304		5.96217	3	detection of chemical stimulus involved in sensory perception, integral component of membrane, membrane	5962167
CBG27347		6.16967	2	integral component of membrane, membrane	6169675
CBG06363		6.17499	0		6174992
CBG27348		6.17631	2	integral component of membrane, membrane	6176309
CBG06379		6.22871	9	DNA binding, metal ion binding, nucleus, regulation of transcription, DNA-templated, sequence-specific DNA binding, steroid hormone mediated signaling pathway, transcription factor activity, sequence-specific DNA binding, transcription, DNA-templated, zinc ion binding	6228710
CBG06388		6.25172	0		6251716
CBG06461		6.56318	7	detection of chemical stimulus involved in sensory perception of smell, G-protein coupled olfactory receptor activity, G-protein coupled receptor signaling pathway, integral component of membrane, integral component of plasma membrane, membrane, olfactory behavior	6563180
CBG06466	Cbr-srw-3	6.57417	4	G-protein coupled peptide receptor activity, G-protein coupled receptor signaling pathway, integral component of membrane, membrane	6574166
CBG06470		6.58828	0		6588279
CBG06477		6.60845	0		6608448
CBG06490		6.64604	0		6646045
CBG06500	Cbr-nhr-159	6.67663	9	DNA binding, metal ion binding, nucleus, regulation of transcription, DNA-templated, sequence-specific DNA binding, steroid hormone mediated signaling pathway, transcription factor activity, sequence-specific DNA binding, transcription, DNA-templated, zinc ion binding	6676631
CBG06518		6.73103	2	integral component of membrane, membrane	6731030
CBG06520		6.73855	3	detection of chemical stimulus involved in sensory perception, integral component of membrane, membrane	6738554
CBG06521		6.74009	3	detection of chemical stimulus involved in sensory perception, integral component of membrane, membrane	6740093
CBG27357		6.74271	0		6742710
CBG06531		6.77009	4	G-protein coupled peptide receptor activity, G-protein coupled receptor signaling pathway, integral component of membrane, membrane	6770088
CBG06533		6.7742	0		6774196
CBG06535		6.78306	2	integral component of membrane, membrane	6783065
CBG06554		6.83101	2	integral component of membrane, membrane	6831011
CBG27361		6.91344	0		6913442
CBG06584		6.91829	2	integral component of membrane, membrane	6918295
CBG06590		6.94561	3	integral component of membrane, membrane, transferase activity, transferring acyl groups other than amino-acyl groups	6945609
CBG06592	Cbr-srsx-8	6.95334	4	G-protein coupled receptor activity, G-protein coupled receptor signaling pathway, integral component of membrane, membrane	6953345
CBG06613	Cbr-srbc-41	7.03459	2	integral component of membrane, membrane	7034593
CBG06666	Cbr-hpo-36	7.26701	2	integral component of membrane, membrane	7267015
CBG27368		7.30118	2	integral component of membrane, membrane	7301176
CBG06706	Cbr-mes-4	7.41139	5	methylation, methyltransferase activity, nucleus, protein binding, transferase activity	7411387
CBG06708		7.41954	0		7419543
CBG06715		7.43225	2	integral component of membrane, membrane	7432255
CBG06720		7.44559	2	oxidation-reduction process, oxidoreductase activity	7445588
CBG06755		7.5753	0		7575296
CBG27380		7.68314	2	integral component of membrane, membrane	7683137
CBG08702		7.70959	2	cholinesterase activity, extracellular space	7709586
CBG08688	Cbr-srx-38	7.76287	4	G-protein coupled receptor activity, G-protein coupled receptor signaling pathway, integral component of membrane, membrane	7762872
CBG27004		7.76898	0		7768977
CBG08684		7.77259	0		7772593
CBG08669		7.8227	0		7822703
CBG08668		7.82442	0		7824425
CBG08640	Cbr-ugt-7	7.90961	8	flavonoid biosynthetic process, flavonoid glucuronidation, glucuronosyltransferase activity, integral component of membrane, intracellular membrane-bounded organelle, membrane, metabolic process, transferase activity, transferring hexosyl groups	7909608
CBG27011		8.06662	11	flavonoid biosynthetic process, flavonoid glucuronidation, glucuronosyltransferase activity, integral component of membrane, intracellular membrane-bounded organelle, membrane, metabolic process, transferase activity, transferase activity, transferring glycosyl groups, transferase activity, transferring hexosyl groups, UDP-glycosyltransferase activity	8066624
CBG08594		8.0712	5	ATP binding, peptidyl-tyrosine phosphorylation, protein kinase activity, protein phosphorylation, protein tyrosine kinase activity	8071201
CBG08581	Cbr-papl-1	8.11322	4	acid phosphatase activity, dephosphorylation, hydrolase activity, metal ion binding	8113221
CBG08577		8.12943	3	endoplasmic reticulum, heparin binding, low-density lipoprotein particle receptor binding	8129429
CBG23377		8.91295	1	nucleic acid binding	8912947
CBG23287	Cbr-ape-1	9.24651	4	intrinsic apoptotic signaling pathway, nucleus, p53 binding, protein binding	9246508
CBG23282	Cbr-ceh-32	9.27233	2	DNA binding, nucleus	9272327
CBG23231		9.50919	0		9509190
CBG23190	Cbr-nas-17	9.63846	8	hydrolase activity, metal ion binding, metalloendopeptidase activity, metallopeptidase activity, molting cycle, collagen and cuticulin-based cuticle, peptidase activity, proteolysis, zinc ion binding	9638460
CBG23140	Cbr-pqn-70	9.81128	0		9811280
CBG23132	Cbr-lgc-49	9.84883	12	cell junction, chloride channel activity, chloride transmembrane transport, chloride transport, extracellular ligand-gated ion channel activity, integral component of membrane, ion transmembrane transport, ion transport, membrane, plasma membrane, synapse, transport	9848829
CBG09693		10.2878	3	detection of chemical stimulus involved in sensory perception, integral component of membrane, membrane	10287814
CBG09579		10.7201	1	binding	10720064
CBG09578		10.7278	0		10727833
CBG09499		10.9829	0		10982872
CBG25136		11.1201	0		11120105
CBG09383		11.3876	3	catalytic activity, integral component of membrane, membrane	11387590
CBG09309		11.6502	8	ATP binding, cytoplasm, nucleus, peptidyl-serine phosphorylation, protein kinase activity, protein phosphorylation, protein serine/threonine kinase activity, regulation of cell shape	11650191
CBG09247	Cbr-ttn-1	11.8612	10	ATP binding, integral component of membrane, kinase activity, membrane, nucleotide binding, phosphorylation, protein binding, protein kinase activity, protein phosphorylation, transferase activity	11861219
CBG18884		11.9317	1	protein binding	11931655
CBG18939		12.1793	1	protein binding	12179313
CBG18972		12.286	0		12285969
CBG18992		12.3694	3	cholinesterase activity, extracellular space, hydrolase activity	12369360
CBG19030		12.4948	0		12494831
CBG27164		12.6919	0		12691888
CBG19127	Cbr-frpr-13	12.8565	4	G-protein coupled peptide receptor activity, G-protein coupled receptor signaling pathway, integral component of membrane, membrane	12856524
CBG19150		12.9466	3	detection of chemical stimulus involved in sensory perception, integral component of membrane, membrane	12946580
CBG19192		13.0723	2	integral component of membrane, membrane	13072298
CBG19224	Cbr-str-177	13.2017	7	detection of chemical stimulus involved in sensory perception of smell, G-protein coupled olfactory receptor activity, G-protein coupled receptor signaling pathway, integral component of membrane, integral component of plasma membrane, membrane, olfactory behavior	13201746
CBG19308	Cbr-ehbp-1	13.5523	3	integral component of membrane, membrane, protein binding	13552270
CBG19340		13.6999	2	negative regulation of endopeptidase activity, serine-type endopeptidase inhibitor activity	13699916
CBG19401	Cbr-mec-9	13.9428	4	calcium ion binding, negative regulation of endopeptidase activity, protein binding, serine-type endopeptidase inhibitor activity	13942808
CBG11544		14.0644	5	cell, cell redox homeostasis, electron carrier activity, oxidation-reduction process, protein disulfide oxidoreductase activity	14064417
CBG11551		14.09	0		14089951
CBG11552	Cbr-irld-57	14.0986	2	integral component of membrane, membrane	14098591
CBG11555	Cbr-str-38	14.1046	7	detection of chemical stimulus involved in sensory perception of smell, G-protein coupled olfactory receptor activity, G-protein coupled receptor signaling pathway, integral component of membrane, integral component of plasma membrane, membrane, olfactory behavior	14104619
CBG11575	Cbr-dnj-3	14.1532	2	integral component of membrane, membrane	14153229
CBG11601		14.2286	2	integral component of membrane, membrane	14228588
CBG11613		14.2849	0		14284856
